# Supplementary material for: circRPS19 affects HK2-mediated aerobic glycolysis and cell viability via the miR-125a-5p/USP7 pathway in gastric cancer
Source: PubMed Central journal article supplement — Int J Oncol. 2023 Jul 10;63(2):98. doi: 10.3892/ijo.2023.5546 (PMC10552706; doi:10.3892/ijo.2023.5546), 2023-07-10
Supplement: Supplementary_Data.pdf [file Supplementary_Data.pdf]

Figure S1. Transfection efficiency. (A) Silencing of circRPS19 induced by specific siRNAs (si-circRPS19-1/2/3) was identified by RT-qPCR. (B) Overexpression of miR-125a-5p by miR-125a-5p mimics in two GC cell lines was determined by RT-qPCR. (C) Silencing of USP7 induced by siRNAs (si-USP7-1/2/3) was identified by RT-qPCR. (D) Overexpression of USP7 in two GC cell lines after transfection with pcDNA3.1-USP7 vector was determined by RT-qPCR. Empty pcDNA3.1 vector was used as NC. \*\*P<0.01 vs. control group. circRPS19, circRNA ribosomal protein S19; si, small interfering; RT-q, reverse transcription-quantitative; miR, microRNA; GC, gastric cancer; USP7, ubiquitin-specific processing protease 7; NC, negative control.

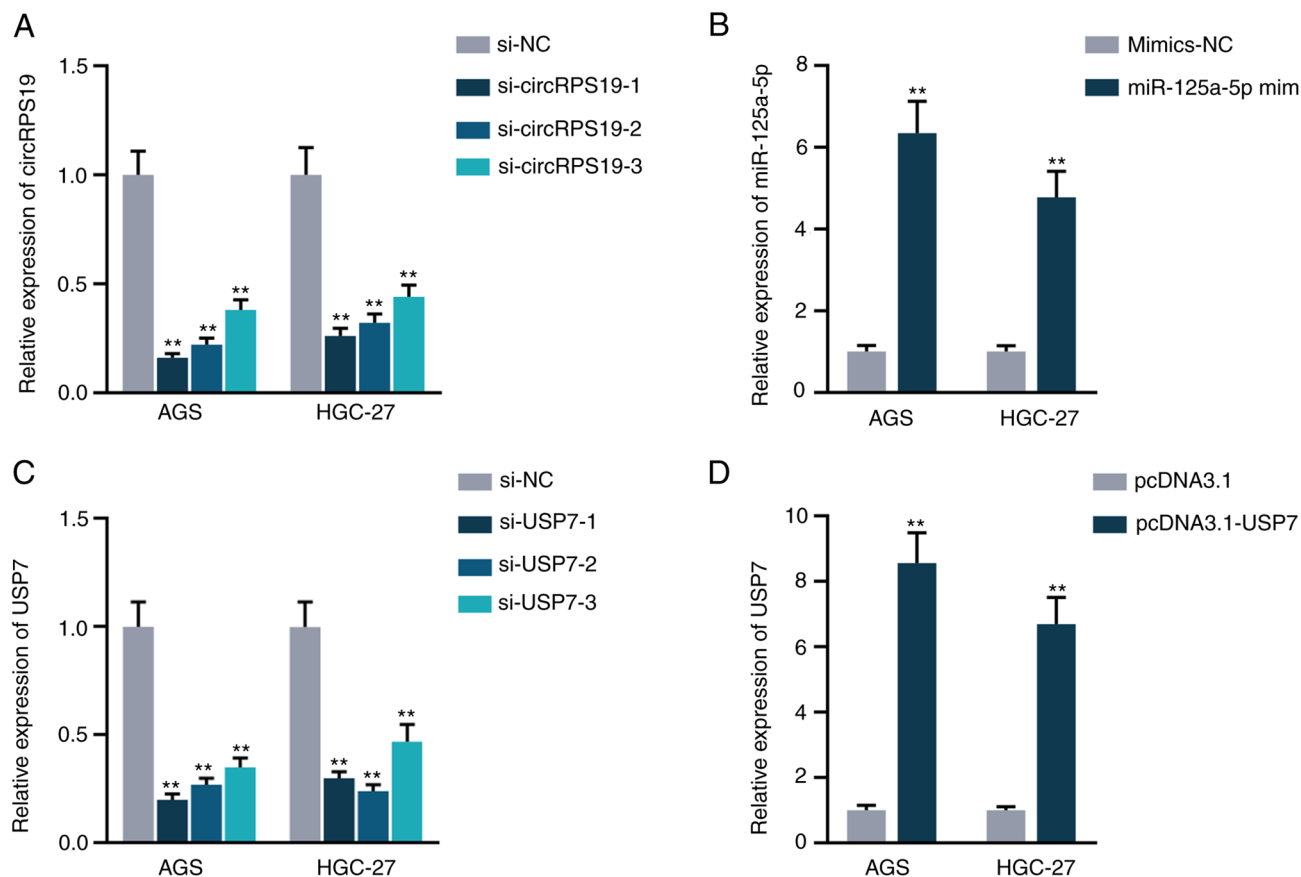

Figure S2. Screening of miRNAs that potentially interact with circRPS19 or USP7. miRNAs potentially interacting with (A) circRPS19 and (B) USP7 3'-UTR were screened using starBase. miRNA, microRNA; circRPS19, circRNA ribosomal protein S19; USP7, ubiquitin-specific processing protease 7; UTR, untranslated region.

**A**

Quick Search: mammal human hg19 miRNA: all CLIP-Data >= 1 Degradome-Data >= 0 target: hsa circ 0051246

The miRNA-circRNA Interactions Supported by Ago CLIP-seq Data

Download: EXCEL TXT

Show/Hide Columns Search:

| miRNA           | MatchGeneID | MatchGeneName | GeneType | TargetSite                 | Alignment                                                                      | Class   | AgoExpNum | CleaveExpNum |
|-----------------|-------------|---------------|----------|----------------------------|--------------------------------------------------------------------------------|---------|-----------|--------------|
| hsa-miR-223-3p  | NM_001022   | RPS19         | circRNA  | chr19:42373769-42373784[+] | Target: 5' -----oggoGCAAACTGACA 3'<br>miRNA : 3' aaccacaaacCGUUUGACDUa 5'      | 8mer    | 22        | 11           |
| hsa-miR-125a-5p | NM_001022   | RPS19         | circRNA  | chr19:42373770-42373793[+] | Target: 5' ggcgcaaacagacacCCACAGGga 3'<br>miRNA : 3' agggccaaawccccAGGCCCCu 5' | 8mer    | 22        | 13           |
| hsa-miR-125b-5p | NM_001022   | RPS19         | circRNA  | chr19:42373772-42373793[+] | Target: 5' ccGCAAACTGACACTCAGGga 3'<br>miRNA : 3' agggGUAAGUg-GAGDCCCtg 5'     | 8mer    | 22        | 13           |
| hsa-miR-670-5p  | NM_001022   | RPS19         | circRNA  | chr19:42373774-42373794[+] | Target: 5' gcaaaCTGACACCTCAGGgaC 3'<br>miRNA : 3' gaggGUAAGUg-GAGDCCCtg 5'     | 7mer-m8 | 22        | 17           |
| hsa-miR-4319    | NM_001022   | RPS19         | circRNA  | chr19:42373777-42373793[+] | Target: 5' aacgacacCCACAGGga 3'<br>miRNA : 3' aaccacaaacAGGCCCCu 5'            | 8mer    | 22        | 13           |

Show 5 entries Previous 1 2 Next

**B**

Quick Search: mammal human hg19 miRNA: all CLIP-Data >= 5 Degradome-Data >= 0 pan-Cancer >= 5 programNum >= 1 program: None target: USP7

The miRNA-mRNA Interactions Supported by Ago CLIP-seq Data

Download: EXCEL TXT

Show/Hide Columns Search:

| miRNA           | GeneName | PITA   | RNA22  | miRmap | microT  | miRanda | PicTar | TargetScan | AgoExpNum | CleaveExpNum | Pan-Cancer |
|-----------------|----------|--------|--------|--------|---------|---------|--------|------------|-----------|--------------|------------|
| hsa-miR-664b-3p | USP7     | 0[0,0] | 0[0,0] | 1[8,0] | 3[10,0] | 0[0,0]  | 1[8,0] | 0[0,0]     | 10        | 0            | 5          |
| hsa-miR-503-5p  | USP7     | 0[0,0] | 0[0,0] | 0[0,0] | 1[8,0]  | 0[0,0]  | 0[0,0] | 0[0,0]     | 8         | 0            | 7          |
| hsa-miR-15a-5p  | USP7     | 0[0,0] | 0[0,0] | 0[0,0] | 1[8,0]  | 0[0,0]  | 0[0,0] | 0[0,0]     | 8         | 0            | 9          |
| hsa-miR-195-5p  | USP7     | 0[0,0] | 0[0,0] | 0[0,0] | 1[8,0]  | 0[0,0]  | 0[0,0] | 0[0,0]     | 8         | 0            | 7          |
| hsa-miR-382-3p  | USP7     | 0[0,0] | 0[0,0] | 0[0,0] | 1[7,0]  | 0[0,0]  | 0[0,0] | 0[0,0]     | 7         | 0            | 6          |
| hsa-miR-524-5p  | USP7     | 1[5,0] | 0[0,0] | 0[0,0] | 1[7,0]  | 0[0,0]  | 0[0,0] | 0[0,0]     | 7         | 0            | 5          |
| hsa-miR-34a-5p  | USP7     | 1[6,0] | 0[0,0] | 0[0,0] | 0[0,0]  | 1[7,0]  | 0[0,0] | 0[0,0]     | 7         | 0            | 10         |
| hsa-miR-34c-5p  | USP7     | 1[6,0] | 0[0,0] | 0[0,0] | 0[0,0]  | 1[7,0]  | 0[0,0] | 0[0,0]     | 7         | 0            | 7          |
| hsa-miR-495-3p  | USP7     | 1[6,0] | 0[0,0] | 0[0,0] | 0[0,0]  | 0[0,0]  | 0[0,0] | 0[0,0]     | 6         | 0            | 5          |
| hsa-miR-125b-5p | USP7     | 0[0,0] | 0[0,0] | 0[0,0] | 1[6,0]  | 0[0,0]  | 0[0,0] | 0[0,0]     | 6         | 0            | 7          |

Show 10 entries Previous 1 2 3 4 5 ... 8 Next
